# Supplementary material for: Acquisition of plasmids conferring carbapenem and aminoglycoside resistance and loss of surface-exposed macromolecule structures as strategies for the adaptation of Acinetobacter baumannii CC104O/CC15P strains to the clinical setting
Source: PubMed Central journal article supplement — Microb Genom. 2020 Mar 26;6(9):mgen000360. doi: 10.1099/mgen.0.000360 (PMC7643966; doi:10.1099/mgen.0.000360), 2020-03-26
Supplement: mgen-6-360-s001.pdf [file mgen-6-360-s001.pdf]

Supplementary material

**Fig. S1: Description of novel ISs found in *A. baumannii* Ab825.** The transposase gene is shown in bold and cargo genes in italics. Inverted repeats IRL and IRR are highlighted in yellow and blue, respectively.

>*ISAb42*; 1,320 bp long

**GAGACTGTAAATTAAATTGTGTAATGCCTGAATTTGCTATGTTTCATATT**CACAACGGA  
GTCAGGCAACATGATGAACGAACAAAACTAAAAGACCTTGCAGCAGAATTTGC  
TAAAGGAATCAAAACAGAAGACGATCTCAATCAATTCACCCGATTGTTGACTAA  
ACTCACTGTTGAAACGGCTCTCAATGCCGAACCTTACCGAACATCTCGGACATGA  
AAAGAATGCTCGTAAGAACGGTTCAAATGCTCGTAACGGTTATTCCAGTAAGAC  
CGTGCTGAGCGATGATGGTGAGATTGAGATCACACACCACGAGATCGTGATG  
GCACATTTGAGCCACAGCTAATTA AAAAGAATCAGACTCGTATCACGCAAATGG  
ATAACCAAATTCTATCCCTTTATGCCAAAGGCATGACTACCCGTGAAATCGTGG  
CTACTTTCAAAGAAATGTACGATGCTGATGTATCGCCAACGCTTATTTCCAAGG  
TGACTGATGCTGTTAAGGAGCAAGTCGCTGAATGGCAAACCGTCCGCTGGAT  
GCACTCTATCCCATCGTCTATATGGACTGTATTGTAGTTAAAGTCCGTCATAATG  
GCAGTGTTATCAACAAGGCTGTATTCTTGCCTTAGGCATTAATCTTGATGGAC  
AGAAAGAACTGCTCGGCATGTGGATGGCTGAGAATGAAGGTGCAAAGTTCTGG  
CTGAATGTCCTGACTGAGCTTAAAAACCGAGGGTTGCAGGATATTCTGATCGCC  
TGTGTGGATGGACTAAAAGGCTTTCCTGATGCCATTAACAGCGTATAACCCGCAA  
ACCATATCCAGCTGTGCATTATCCATATGCTGCGTAACAGCTTGAAATACGTAT  
CATGGAAAGATTACAAGGCCGTCCTCAGGATTTAAAAACCGTTTATCAGTCAC  
CTACTGAAGAGGCAGCCTTGATGGCCTTGGATCAATTCGCCCAAACATGGGAT  
GACAAGTACCCACAGATCAGCAAAGCTGGCGTACACACTGGGAGAATCTAAA  
TACCTTCTTTGCTTATCCAGCCGAGATACGCAAAGCCATCTATAACCAATGCG  
ATCGAATCATTAACAGCGTAATACGTCAGGCGATCAAAAAGCGTAAAGTCTTT  
CCAACGGATGATTCTGTACGTAAAGTGATTTACCTGGCAATTGATGCAGCGTCT

28 AAAAAGTGAATATGCCTATTCGCGACTGGCGTTTAGCCATGAGCCGCTTTATT  
29 ATTGAATTCGGTGACCGCTTAAGCAATCACCTTTAAATTTATGAAAAGCAATTACA  
30 CAAAATTATTTACAGGCTC

31

32 IR-L:GAGACTGTAAATTAATTTGTGTAATTGCCTGAATTTGCTATGTTTCATATT

33 IR-R:GAGCCTGTAAATAATTTTGTGTAATTGCTTTTCATAAATTTAAAGGTGAT

34

35 DR length: 8 bp

36

37

38 >TnpA (coord: 70-1281, 403 aa)

39 MMNEQKLKDLAAEFAKGIKTEDDLNQFTRLLTKLTVETALNAELTEHLGHEKNARKNG

40 SNARNGYSSKTVLSDDGEIEITTPRDRDGTFFEPQLIKKNQTRITQMDNQILSLYAKGMITT

41 REIVATFKEMYDADVSP TLISKVTD AVKEQVAEWQNRPLDALYPIVYMDCIVVKVRHN

42 GSVINKAVFLALGINLDGQKELLMWMAENEGAKFWLNVLTELKNRGLQDILIAACVDG

43 LKGFDPDAINSVYPQTHIQLCIIHMLRNSLKYVSWKDYKAVTQDLKTVYQSPTEEAALM

44 ALDQFAQ TWDDKYPQISKSWRTHWENLNTFFAYPAEIRKAIYTTNAIESLNSVIRQAIKK

45 RKVFPTDDSVRKVIYLAIDAASKKWNMPIRDWRLAMSRFIIIEFGDRLSNHL

46

47

48 >ISAb43; 2,655 bp long

49 GTTCTTTGCACTTTAGCGTGAAGATTGTTACGATATGGACTCATCCATGAGATAACCC

50 GCACATGAGCGCTACCAAGAAAGCAGACAAGTAAGCCGCAGCAACCTTCGTTTTTCG

51 GTTGTGCGGCGTTCTCAAGAACCTAGTTGCTCTGCAAGAGCGCCGCAAATTCTTA

52 ACTTAAGGAGATGGCTTCGTGCGCTCAAAGATTTTTCTTGGCGGTATTCTCTCCCGCC

53 ACGCTATTGCTGTIATCACCATTGATTGCTGGCGTCACTGGGCATGGATATGTACCTGC

54 CCGTGGTGCCTTTCATGGCGGATGCACTTGGGTCCGGTGCAGGGACGATCCAGCTGACG

55 TTGACGGCATACTGGTTTTGCTTGGAGCCGGACAGCTTCTCTTCGGCCCACTGTCGGAT  
56 CGGCTGGGTCGCCGCCCGTTTTACTTGGTGGCGGGATTGCCTATATTGCGGCTTCATTC  
57 GGCTCACCGTAGTTTCATCGCCAGAACTTTTTCTGAGCTTCCGCGTTCTTCAGGCCTGC  
58 GGGCTTCGGCATGTCTCGTTTTCACTTTTCGCGACGGTACGCGACATCTATTTCGGGCCGT  
59 GAGGAAAGCAACGTCATCTATGGCTTGCTCGGCTCTATGCTTGCGATGGTTCCTGCGATA  
60 GGCCCACTGCTAGGAGCGCTGGTCGACGCGTGGCTCGGATGGCGCGCAATCTTCGGCT  
61 TGCTAGGGATGGCAATGATAGGCGCTGTTATCGCAGCCTGGCGACTCTGGCCAGAGACTC  
62 GGCGGCACCGGACGGCAGACCTACAGTGGTCGCAGCTATTGACTCCTGTGAAACACCTG  
63 AACTTCTGGCTGTACACGCTCTGTTACAGCGCGGGGATGGGCAGCTTTTTTCGTCTTTTTCT  
64 CGACCGCCCCCTGGCTAATGATGGGGAGGCAAGGGTTATCGCAACTTAGCTTCAGCTTGC  
65 TATTTGCTACAGTGGCCATCGCTATGATGGCTACAGCGGAATCATGGGACGACTGATTCC  
66 CCGGTGGGGAAGCCTGAAGACCTTACGAGTGGGAATGGGGTGTCTGATGGCGGGAGCG  
67 CTGTTGCTCGCTGTTGGCGAGACATTGGCACCGGTCTCGGTGCTTGGCTTCATCGCCCC  
68 GATGTGGCTCGTGGGTGTTGGTATCGCCACTGCGGTATCGGTGGCACCCAATGCCGCTC  
69 TTCGAGGTTTCGATCATATCGCTGGGACCGCTACAGCAGTCTACTTCTGTTTGGGTGGACT  
70 ACTGTTAGGGATTATCGGGACACTCATTATTACGCTTTTTATCGACTGGTACCACCTGGCCGA  
71 TCATCGCTTATTGCCTCATCCTCGCAACAGCAGTGCTTTGTCTGTCTGCATCAATCCCAA  
72 CAGACGCCATCTCAGCCAAGAAGAACATGATGCCTTGGCGCTACAAGGCACCGATAGCGC  
73 GCAATCGGTCCATGATCATGACTAGCGCTGATGTTTGGAGCCTGTTCTGGAAGGGC  
74 TTTTCGCCAGCGTCTCATGGGCTTCTAGATGAACAGACTTTGCTGATCCGTCTT  
75 ACACACGACGAGGAGCATA CGCCAATTTGTAGCCGATGCGATTGCCCTTGTTTC  
76 CTGGTACATGACATCAATTGGCGCCGAGTTCGCGAGTCACCAATTATGCAGTAT  
77 CGCGTCGAGTTGGATGTACCTGTGCGGGCGGCTGCGTTGTCCACAATGCGGTCC  
78 AACCAGAGAGCGGATCGATTGGCTACCACCGCGCTCCCGTATTACGCAATCATT  
79 GCGCAACTGGATTGAGAAATTAGTACAGATGCTGCCCGTCAGTCATGTTGCCAA  
80 TCTTTTGGGCTTGCATTGGCATA CAGTCAAGACTATTGACATGGAGCGGCTCAA  
81 ACGTGATTTGCACGAGCCAGATCGAAGTCGATTGCGCCGCCTGATGATGGACG

82 AATTCGCCTTGACACAAGGGTCATCGCTACGCCACGGTGGTCGCCTGTGCCGAC  
83 ACCCAGCAAGTGGTGTGGATTGGCGAGGGCCGCTCGCGTGAGGCGATCCGGC  
84 CGTTCTTCGAGTGGTTAGGCGATGCCCGGAACCAGATCGAGGCAGTGGCCATG  
85 GACATGAACTCAGCCTTCGATCTTGAAGTGAAGGCCAGTGCCCCAACGCGGT  
86 GGTGGTCTACGACCTGTTCCATGTGGTGGCTAAGTATGGCCGCGAAGTGATGG  
87 ATAGAGTGCAGATTGATCAGGCCAATCAACTGCGAGATGACAAGGTCGCCCCG  
88 AAGGTGATCAAAAGCAGCCGTTGGATACTGTTACGCAATGCTGACAACCTTGA  
89 GCCCGAGCAGGCGGTCAAGCTGGACGAACTCCTGGCCGCAATGCGTTCTTGA  
90 CTACGGTGTACGTGCTCAAGGACCAACTTAAGACGCTATGGTTTGCGGAAAGC  
91 GAGACGACGGCCAGAAGCGCCTGGCGGGAATGGGCCGGCATGGCCCTCGGTA  
92 GCGGAATTGATGCTTTGGTACGATTTGCCAAGAAGCTGGAGCCATATATGGAGG  
93 GTATCGTTTCCAGTGCCCTCCACCGGCTGAACACCAGCGTGCTGGAGGGCATG  
94 AACAAACCGGATCAAAGTCATTAAGCGGATGGCCTATGGATACCGCGACACGGA  
95 CTA CT TCTT CCTCAAGATCCGTGCTGCATTCCCGGCAAAGTGCGATGAAC  
96  
97  
98  
99 IRL: GTTCTTTGCACTTTAGCGTGAAGATTGTTACGATATGGACTCATCCATGAGATAA  
100 CCCGCACATG  
101 IRR: GTTCATCGCACTTTGCCGGGAAATGCAGCACGGATCTTGAGGAAGAAGTAGTCCGTG  
102 TCGCGGTA  
103  
104 DR length: 8/10 bp  
105  
106 >ORF1 Chloramphenicol resistance protein drug resistance transporter, Bcr/CflA subfamily  
107 [*Acinetobacter baumannii* Ab825sp] (coord: 190-1455; 1266 bp; 421 aa )  
108 MRSKDFSWRYSLPATLLLLSPFDLLASLGMDMYLPVVPFMADALGSGAGTIQLTLTAYL

109 VLLGAGQLLFGPLSDRLGRRPVLLGGGIAYIAASFGLTVVSSPELFLSFRVLQACGASAC  
110 LVSTFATVRDIYSGREESNVIYGLLGSMLAMVPAIGPLL GALVDAWLGWRAIFGLLGMA  
111 MIGAVIAAWRLWPETRRHRTADLQWSQLLTPVKHLNFWLYTLCYSAGMGSSFFVFFSTAP  
112 WLMGRQGLSQLSFSLLFATVAIAMMATARIMGRLIPRWGSLKTLRVGMGCLMAGALL  
113 LAVGETLAPVSVLGFAPMWLVGVGIATAVSVAPNAALRGFDHIAGTATAVYFCLGGLLL  
114 GIIGTLIITLLSTGTTWPIIAYCLILATAVLCCLSCINPNRRHLSQEEHDALALQGTDSAQSVH  
115 DHD  
116  
117 >ORF2 Transposase DDE Domain [Acinetobacter baumannii Ab825sp] (coord: 1448-2653;  
118 1206 bp; 401 aa)  
119 MTSADVWSLFWKGFSPASHGLLDEQTLLIRLTHDEEHTPICSRDCDCPCFLVHDINWRRV  
120 RESPIMQYRVELDVPVRRRLRCPQCGPTRERIDWLPPRSRITQSLRNWIEKLVQMLPVSHV  
121 ANLLGLHWHTVKTIDMERLKRDLHEPDRSRLRRLMMDEFALHKGHRYATVACADTQ  
122 QVWVWIGEGRSREAIRPFFEWLGDARNQIEAVAMDMSAFDLEVKAQCPNAVVVYDLFH  
123 VVAKYGREVM DRVVRVDQANQLRDDKVARKVIKSSRWILLRNADNLEPEQAVKLDLLE  
124 AANAFLTTVYVLKDQLKTLWFAESETTARSAWREWAGMALGSGIDALVRFKLEPY  
125 MEGIVSSALHRLNTSVLEGMNNRIKVIKRMAYGYRDTDYFFLKIRAAFPKVR

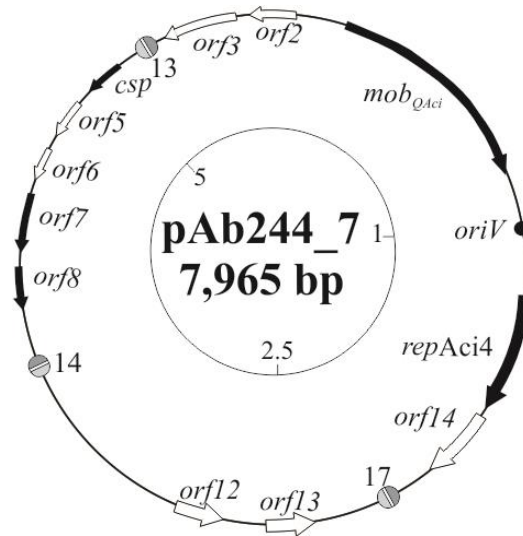

135 **Figure S2. Organization and gene content of plasmid pAb244\_7.** Inferred scheme of  
 136 pAb244\_7 plasmid (MG520098). The ORFs and their corresponding orientations are denoted by  
 137 arrows. Closed arrows correspond to genes with described functions, whereas open arrows  
 138 relate to unknown functions in databases. A dark circle denotes the predicted *oriV* region, whose  
 139 starting bases were arbitrarily set to 1 in the clockwise scale (innermost circle) that also  
 140 indicates the corresponding kbp. XerC/D-like binding sites are shown as dark/gray ovals.  
 141

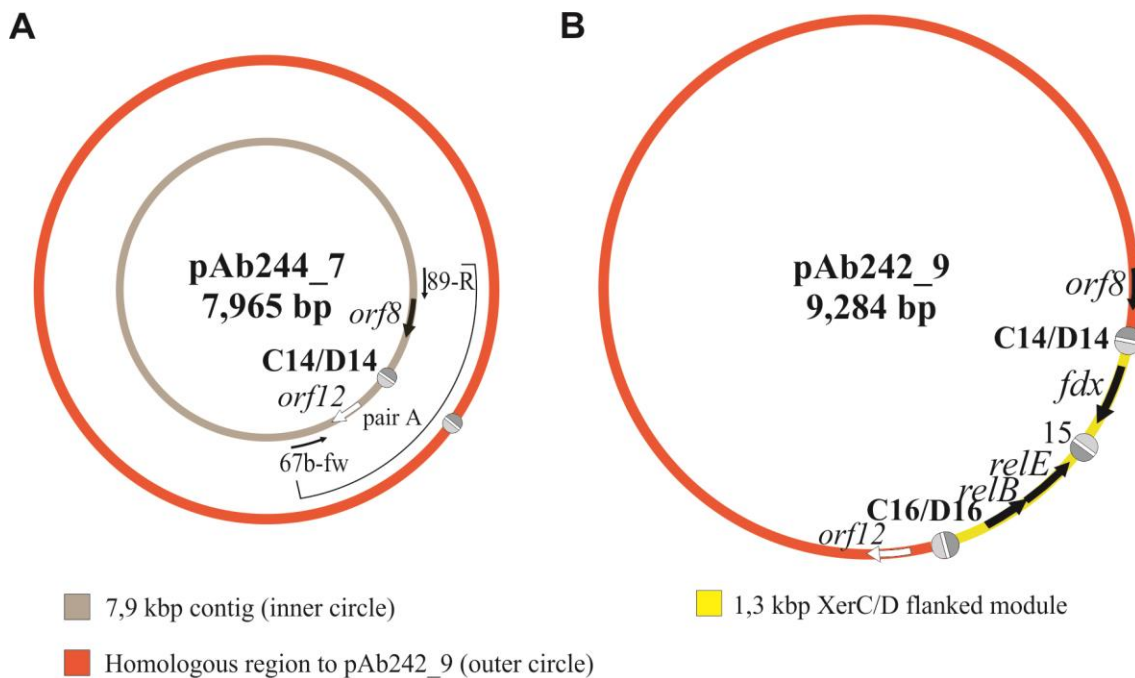

142  
 143 **Figure S3. Schematic representation of pAb244\_7 sequence inferred by comparative**  
 144 **sequence analysis and gap closure strategy.** A. The circular form of pAb244\_7 (gray inner  
 145 circle) was confirmed by gap closure of the contigs assembled from the pyrosequencing data.  
 146 The primer pair A (67b-fw and 89-R) used for this purpose is described in Supplementary Table  
 147 S1. The sequence of the corresponding amplicon was verified by sequencing analysis. Regions  
 148 of homology between pAb244\_7 and pAb242\_9 from Ab242 [1] are indicated by the outer

149 circle in orange. Relevant XerC/D (C/D) sites identified in these plasmids are indicated as  
150 circles (not drawn to scale), with the XerC (C) and XerD (D) recognition motifs depicted as  
151 dark gray and light gray semi-circles, respectively. The *orf8*, *orf12* genes and the XerC/D  
152 recognition site #14 (C14/D14) are shown. **B.** Representation of the pAb242\_9 plasmid  
153 containing a 1.3 kbp region (depicted in yellow) flanked by XerC/D sites, which are absent from  
154 pAb244\_7.

155

# K-Locus

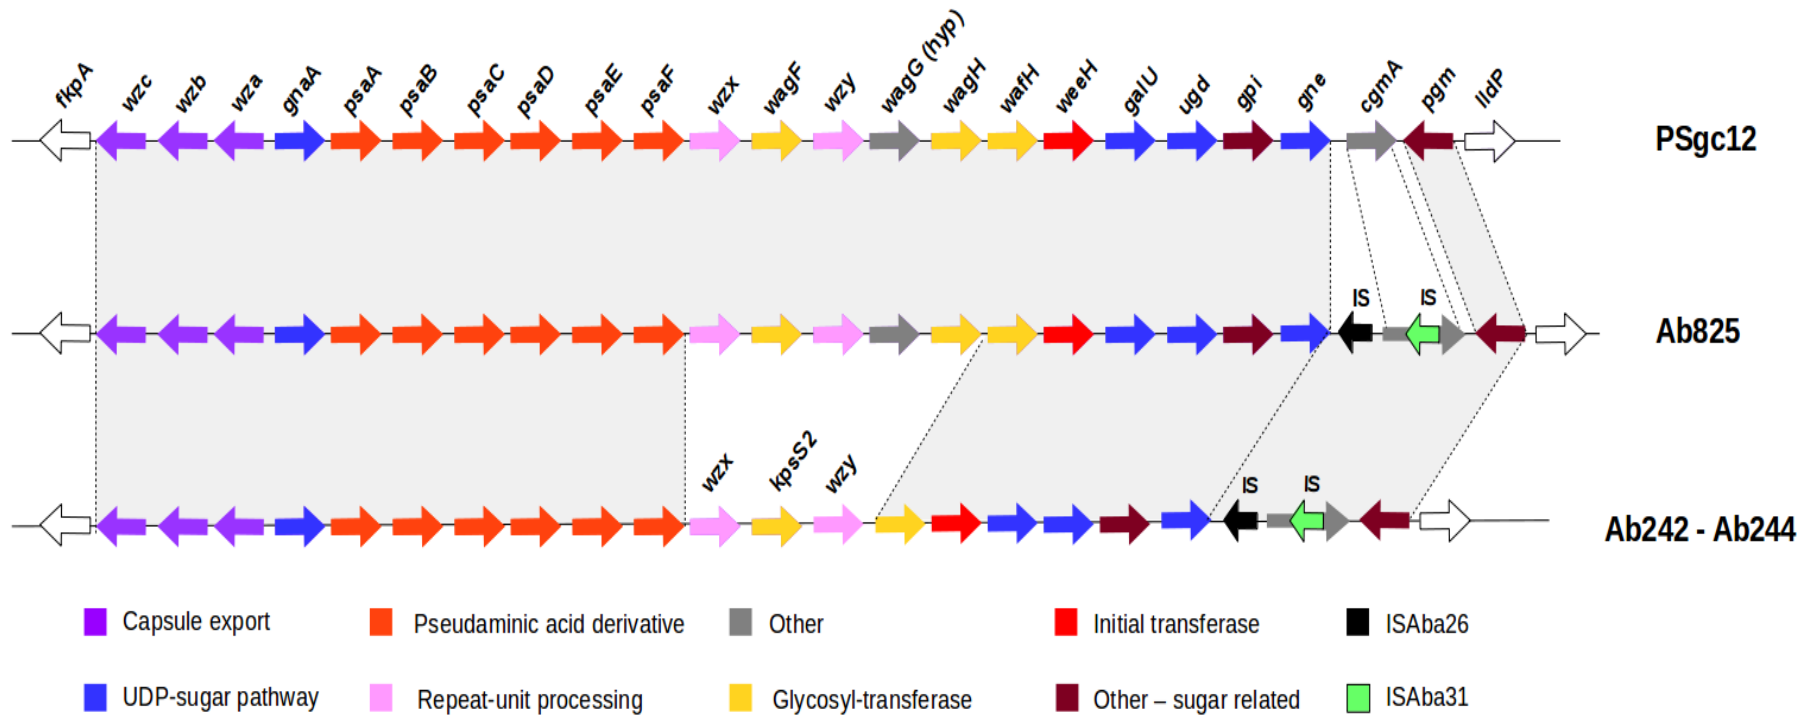

156

157 **Figure S4. Genetic organization of K loci in strains under study.** A novel K-locus with a similar gene composition to the PSgc12 [2] was identified. This locus is  
 158 identical between strains Ab242 and Ab244, whereas in strain Ab825, the presence of two additional ORFs predicted to code for glycosyl-transferase proteins was  
 159 observed. It contains a gene cluster (*psaA-psaF*) predicted to direct the synthesis of a pseudaminic acid derivative. Notably, the *gne* gene, which codes for a UDP-  
 160 NAc-glucose-4-epimerase, is followed by an *ISAb26* in all strains. Moreover, the *cgmA* gene is interrupted by an *ISAb31* (see text for details). The gray-shaded  
 161 background interconnecting the different structures highlights the homologous regions (nucleotide sequences  $\geq 90\%$  identity). Genes are coloured according to the



162 code shown in the figure. The genes are not drawn to scale.  
163

164 **List of Supplementary Tables**

165 **Table S1: Oligonucleotide primers used for PCR analysis and primer walking**

166 **Table S2: MLST classification data.**

167 **Table S3: Prophages carried by *A. baumannii***

168 **Table S4: IS-related genes in *A. baumannii* strains under study.**

169 **Table S5: Antimicrobial susceptibility profiles of *A. baumannii* Ab242, Ab244 and Ab825 as**  
 170 **determined with VITEK-2**

171 **Table S6: Genes putatively contributing to resistance to antimicrobials in *A. baumannii***  
 172 **strains under study.**

173 **Table S7: Putative virulence factors present in *A. baumannii* strains under study.**

174 **Table S8: Location of insertion sequences found in *A. baumannii* Ab242, Ab244 and Ab825**  
 175 **chromosomes.**

176

177 **Table S1. Oligonucleotide primers used for PCR analysis**

| Primer pairs |        | DNA molecule     | Annealing region coordinates | Sequence (5'→3')                        | Expected product size (bp) | Application                                   | Reference or source |
|--------------|--------|------------------|------------------------------|-----------------------------------------|----------------------------|-----------------------------------------------|---------------------|
| A            | 67b-Fw | pAb244_7         | 4,412-4,442                  | AGCGTAAAAGACCA<br>GTTTGGCGTTAAAC<br>ACG | 2,616                      | Plasmid gap-closure<br>(see Fig. S2)          | This work           |
|              | 89-R   | pAb244_7         | 1,827-1,854                  | GTATCCCTGTTCCA<br>GAACACGTTGAGCC        |                            |                                               |                     |
| B            | usp-fw | Ab242/chromosome | 504-522<br>(contig 86)       | ACCGAGCATGATTC<br>CAGTA                 | 1,600                      | Confirmation of ISAb125 insertion into Tn6022 | This work           |
|              | orf-rv |                  | 38,463-38,479<br>(contig 87) | GGTGTCCGAGCATA<br>AGC                   |                            |                                               | This work           |

178

179 **Table S5. Antimicrobial susceptibility profiles of *A. baumannii* Ab242, Ab244 and Ab825 as**  
 180 **determined by VITEK-2**  
 181

| 182 <b>Antimicrobial</b>                             | 182 <b>MIC (<math>\mu\text{g/ml}</math>)<sup>a</sup></b> |                |                |
|------------------------------------------------------|----------------------------------------------------------|----------------|----------------|
|                                                      | <b>Ab242</b>                                             | <b>Ab244</b>   | <b>Ab825</b>   |
| 183 Ampicillin                                       | $\geq 32$ (R)                                            | $\geq 32$ (R)  | $\geq 32$ (R)  |
| 183 Ampicillin/Sulbactam                             | 16 (R)                                                   | $\geq 32$ (R)  | 16 (R)         |
| 184 Piperacillin/Tazobactam                          | $\geq 128$ (R)                                           | $\geq 128$ (R) | $\geq 128$ (R) |
| 184 Cefotaxime                                       | $\geq 64$ (R)                                            | $\geq 64$ (R)  | $\geq 64$ (R)  |
| 185 Ceftazidime                                      | 16 (I)                                                   | $\geq 64$ (R)  | $\geq 64$ (R)  |
| 185 Cefepime                                         | 16 (I)                                                   | 32 (R)         | 32 (R)         |
| 186 Imipenem                                         | $\geq 16$ (R)                                            | $\leq 0.5$ (S) | $\geq 16$ (R)  |
| 186 Meropenem                                        | $\geq 16$ (R)                                            | $\leq 0.5$ (S) | $\geq 16$ (R)  |
| 187 Nalidixic acid                                   | $\geq 32$ (R)                                            | $\geq 32$ (R)  | $\geq 32$ (R)  |
| 187 Ciprofloxacin                                    | $\geq 4$ (R)                                             | $\geq 4$ (R)   | $\geq 4$ (R)   |
| 188 Amikacin                                         | $\geq 64$ (R)                                            | 16 (R)         | $\geq 64$ (R)  |
| 189 Sulfamethoxazole/<br>Trimetoprim<br>(23.75/1.25) | $\geq 320$ (R)                                           | $\geq 320$ (R) | $\geq 20$ (S)  |
| 190 Tetracycline <sup>b</sup>                        | 2                                                        | 4              | 64 (R)         |

191 <sup>a</sup>The antimicrobial susceptibility profiles of the strains was evaluated using  
 192 the VITEK-2 System (bioMérieux) following the criteria recommended by  
 193 CLSI standards. Interpretation: S: susceptible; R: resistant; I: intermediate.

194 <sup>b</sup>Determined by the macrodilution method using MH broth in accordance to  
 195 CLSI recommended procedures  
 196

197 **Table S8. Location of insertion sequences found in *A. baumannii* Ab242, Ab244 and Ab825 chromosomes<sup>a</sup>.**

| <b>Ab242</b> |                         |                    |                                                       |                                                           |                                          |                                               |                                                      |                                                            |                                          |
|--------------|-------------------------|--------------------|-------------------------------------------------------|-----------------------------------------------------------|------------------------------------------|-----------------------------------------------|------------------------------------------------------|------------------------------------------------------------|------------------------------------------|
| <b>IS</b>    | <b>IS locus tag</b>     | <b>IS location</b> | <b>Locus tag(s) of the disrupted gene<sup>b</sup></b> | <b>Putative function of the disrupted gene</b>            | <b>Locus tag(s) of IS flanking genes</b> | <b>Putative function of IS flanking genes</b> | <b>Metabolic pathway/Virulence Factor</b>            | <b>Number of genomes with same IS location<sup>c</sup></b> | <b>Ref. genome locus Tag<sup>d</sup></b> |
| ISAb42       | CJU83_05025             | In                 | CJU83_05020 (N)                                       | Type I secretion system-dependent protein                 | -                                        | -                                             | Ca <sup>2+</sup> -binding protein, RTX toxin-related | N/R                                                        |                                          |
| ISAb43       | CJU83_05970-CJU83_05975 | In                 | CJU83_05965 (N)                                       | PhzF-like                                                 | -                                        | -                                             | Phenazine biosynthesis                               | N/R                                                        |                                          |
| ISAb31       | CJU83_07630             | In                 | CJU83_07625 (N)-CJU83_07635 (C)                       | Hypothetical                                              | -                                        | -                                             | Ph242-B                                              | N/R                                                        |                                          |
| ISAb125      | Not annotated           | In                 | -                                                     | -                                                         | CJU83_17340/CUJ17770                     | UspA/Hypothetical protein                     | AbaR-like                                            | N/R                                                        |                                          |
| ISAb26       | CJU83_18565             | IR                 | -                                                     | -                                                         | CJU83_18560/CJU83_18570                  | Gne/CgmA                                      | K locus for capsule biosynthesis                     | N/R                                                        |                                          |
| ISAb31       | Not annotated           | In                 | CJU83_18570                                           | Lipoteichoic acid synthase (LTA) like domain protein CgmA | -                                        | -                                             | K locus for capsule biosynthesis                     | N/R                                                        |                                          |
| <b>Ab244</b> |                         |                    |                                                       |                                                           |                                          |                                               |                                                      |                                                            |                                          |
| <b>IS</b>    | <b>IS locus tag</b>     | <b>IS location</b> | <b>Locus tag(s) of disrupted gene<sup>a</sup></b>     | <b>Putative function of disrupted gene</b>                | <b>Locus tag(s) of IS flanking genes</b> | <b>Putative function of IS flanking genes</b> | <b>Metabolic pathway/Virulence Factor</b>            | <b>Number of genomes with same IS location<sup>b</sup></b> | <b>Ref. genome locus Tag<sup>c</sup></b> |
| ISAb1        | CVG52_05305             | IR                 | -                                                     | -                                                         | CVG52_05300/CVG52_05310                  | <i>bla</i> <sub>ADC</sub> - beta-lactamase    | Resistance to beta-lactamics                         | 736                                                        | M3Q_2831/M3Q_2828                        |
| ISAb42       | CVG52_05065             | In                 | CVG52_05060 (N)                                       | Type I secretion system-dependent protein                 | -                                        | -                                             | Ca <sup>2+</sup> -binding protein, RTX toxin-related | N/R                                                        |                                          |

| ISAb31       | CVG52_07330                     | In          | CVG52_07325 (N)<br>CVG52_07335 (C)          | Hypothetical protein                                            | -                                 | -                                                                                                                              | Ph244-B                                | N/R                                                  |                                    |
|--------------|---------------------------------|-------------|---------------------------------------------|-----------------------------------------------------------------|-----------------------------------|--------------------------------------------------------------------------------------------------------------------------------|----------------------------------------|------------------------------------------------------|------------------------------------|
| ISAb125      | CVG52_11015                     | In          | CVG52_11010<br>(pseudogene)                 | CinA                                                            | -                                 | -                                                                                                                              | Competence                             | 30                                                   | M3Q_1781                           |
| ISAb26       | CVG52_18150                     | IR          | -                                           | -                                                               | CJU83_18145/<br>CJU83_18155       | CgmA/Gne                                                                                                                       | K locus for<br>capsule<br>biosynthesis | N/R                                                  |                                    |
| ISAb31       | Not annotated                   | In          | CVG52_18145                                 | Lipoteichoic acid<br>synthase (LTA)-like<br>domain protein CgmA | -                                 | -                                                                                                                              | K locus for<br>capsule<br>biosynthesis | N/R                                                  |                                    |
| <b>Ab825</b> |                                 |             |                                             |                                                                 |                                   |                                                                                                                                |                                        |                                                      |                                    |
| IS           | IS locus tag                    | IS location | Locus tag(s) of disrupted gene <sup>a</sup> | Putative function of disrupted gene                             | Locus tag(s) of IS flanking genes | Putative function of IS flanking genes                                                                                         | Metabolic pathway/Virulence Factor     | Number of genomes with same IS location <sup>b</sup> | Ref. genome locus Tag <sup>c</sup> |
| ISAb125      | CLM70_00285                     | In          | CLM70_00280<br>CLM70_00290                  | Sodium dependent transporter                                    | -                                 | -                                                                                                                              | -                                      | N/R                                                  |                                    |
| IS10R        | CLM70_00700<br>-<br>CLM70_00705 | IR          | -                                           | -                                                               | CLM70_00695/<br>CLM70_00710       | Acetamidase-<br>Formamidase/ABC<br>transporter<br>substrate-binding<br>protein                                                 | Variety of<br>functions/Transp<br>ort  | N/R                                                  |                                    |
| ISAb31       | Not annotated                   | In          | CLM70_02585<br>(pseudogene)                 | Di-guanylate cyclase<br>(GGDEF domain)                          | -                                 | -                                                                                                                              | Biofilm<br>regulation                  | 23                                                   | M3Q_798                            |
| ISAb1        | CLM70_02870                     | In          | CLM70_02875<br>(pseudogene)                 | Sensor histidine kinase                                         | -                                 | -                                                                                                                              | Transcriptional<br>regulation          | 31                                                   | M3Q_3394                           |
| IS10R        | Not annotated                   | IR          | -                                           | -                                                               | CLM70_03360/<br>CLM70_03605       | Putative esterase or<br>lipase (alpha/beta<br>hydrolase<br>fold)/DapE N-<br>succinyl-L,L-<br>diaminopimelate<br>desuccinylase. | DAP                                    | N/R                                                  |                                    |

|          |                             |    |                                                            |                                                 |                             |                                                                                                          |                                                                               |     |                        |
|----------|-----------------------------|----|------------------------------------------------------------|-------------------------------------------------|-----------------------------|----------------------------------------------------------------------------------------------------------|-------------------------------------------------------------------------------|-----|------------------------|
| IS10R    | Not annotated               | IR | CLM70_04515/<br>CLM70_04900                                | Diacylglycerolkinase/<br>metallohydrolase       | -                           | -                                                                                                        | Phospholipid<br>metabolism/urea<br>cycle and<br>metabolism of<br>amino groups | N/R |                        |
| IS10R    | Not annotated               | IR | -                                                          | -                                               | CLM70_04520/<br>CLM70_04910 | Amidohydrolase<br>DapE/ Holliday<br>junction DNA<br>helicase RuvB                                        | DAP                                                                           | 7   | M3Q_3063 /<br>M3Q_3064 |
| ISAbA825 | CLM70_04990                 | In | CLM70_04985<br>(pseudogene)                                | CarO outer membrane<br>protein                  | -                           | -                                                                                                        | Carbapenem<br>resistance                                                      | 9   | M3Q_3047               |
| ISAbA42  | Not annotated               | In | CLM70_04995<br>(pseudogene)                                | Type I secretion<br>system-dependent<br>protein | -                           | -                                                                                                        | Ca <sup>2+</sup> -binding<br>protein, RTX<br>toxin-related                    | N/R |                        |
| ISAbA1   | Not annotated               | IR | -                                                          | -                                               | CLM70_05835/<br>CLM70_06100 | <i>bla</i> <sub>ADC</sub> - beta-<br>lactamase                                                           | Resistance to<br>beta-lactamics                                               | 736 | M3Q_2831 /<br>M3Q_2828 |
| ISAbA43  | CLM70_06200/<br>CLM70_06205 | In | CLM70_06195<br>(pseudogene)                                | PhzF                                            | -                           | -                                                                                                        | Phenazine<br>biosynthesis                                                     | N/R |                        |
| ISAbA1   | Not annotated               | IR | -                                                          | -                                               | CLM70_06590<br>CLM70_06595  | Transcriptional<br>regulator, TetR<br>family/Sigma-<br>fimbriae<br>uncharacterized<br>paralogous subunit | Transcriptional<br>regulation/Type<br>I-Pili component<br>CsuAB               | 184 | M3Q_2687/<br>M3Q_2688  |
| ISAbA125 | Not annotated               | In | CLM70_06600<br>(pseudogene)<br>CLM70_06605<br>(pseudogene) | CsuA                                            | -                           | -                                                                                                        | Type I-Pili<br>component                                                      | 36  | M3Q_2685               |
| IS10R    | Not annotated               | In | CLM70_06820 (N)<br>CLM70_06810 (C)                         | Alanine racemase                                | -                           | -                                                                                                        | Cell wall<br>synthesis                                                        | N/R |                        |
| ISAbA125 | Not annotated               | In | CLM70_06890<br>(pseudogene)<br>CLM70_06895                 | Biofilm PGA synthesis<br>deacetylase PgaB       | -                           | -                                                                                                        | EPS synthesis                                                                 | 4   | M3Q_2611               |

|         |               |    |                                                            |                                                                                |                                            |                                                                                     |                                                               |     |                       |
|---------|---------------|----|------------------------------------------------------------|--------------------------------------------------------------------------------|--------------------------------------------|-------------------------------------------------------------------------------------|---------------------------------------------------------------|-----|-----------------------|
| ISAb42  | Not annotated | IR | -                                                          | -                                                                              | CLM70_07550<br>CLM70_07820                 | Phage<br>integrase/Transcripti<br>onal regulator                                    | -                                                             | N/R |                       |
| ISAb31  | Not annotated | In | CLM70_07890(N)<br>(pseudogene)<br>CLM70_07915(C)           | Hypothetical/Hypotheti<br>cal                                                  | -                                          | -                                                                                   | Ph825-B                                                       | N/R |                       |
| ISAb43  | Not annotated | IR | -                                                          | -                                                                              | CLM70_07925<br>CLM70_08175                 | Transcriptional<br>regulator, TetR<br>family/Nitrogen<br>regulation protein<br>NtrC | Transcriptional<br>regulation/Gln<br>Synthetase<br>regulation | 9   | M3Q_2447<br>/M3Q_2448 |
| ISAb125 | Not annotated | IR | -                                                          | -                                                                              | CLM70_08875<br>(pseudogene)<br>CLM70_09040 | Hypothetical/Hypot<br>hetical                                                       | -                                                             | N/R |                       |
| ISAb43  | CLM70_09440   | In | CLM70_09435<br>(pseudogene)<br>CLM70_09445                 | Phospholipase D                                                                | -                                          | -                                                                                   | Host<br>colonization                                          | 2   | M3Q_3378              |
| ISAb125 | Not annotated | In | CLM70_09885<br>(pseudogene)<br>CLM70_09890<br>(pseudogene) | Ribonuclease D                                                                 | -                                          | -                                                                                   | -                                                             | 17  | M3Q_2071              |
| ISAb125 | Not annotated | In | CLM70_09930 (N)                                            | Hypothetical                                                                   | -                                          | -                                                                                   | -                                                             | N/R |                       |
| ISAb125 | Not annotated | In | CLM70_11630<br>(pseudogene)                                | CinA                                                                           | -                                          | -                                                                                   | Competence                                                    | 30  | M3Q_1781              |
| ISAb43  | CLM70_11635   | In | CLM70_11640<br>(pseudogene; C)<br>CLM70_11915 (N)          | Cytosine, purine,<br>uracil, thiamine,<br>allantoin permease<br>family protein | -                                          | -                                                                                   | -                                                             | 9   | M3Q_1895              |
| ISAb125 | Not annotated | In | CLM70_12310<br>CLM70_12315                                 | T6SS component AsaA                                                            | -                                          | -                                                                                   | Type 6 secretion<br>system                                    | N/R |                       |
| ISAb125 | Not annotated | IR | -                                                          | -                                                                              | CLM70_12475<br>CLM70_12590                 | Rhs-family<br>protein/Hypothetical                                                  | Toxin/<br>Hypothetical                                        | N/R |                       |

|         |                            |    |                                                   |                                                           |                                             |                                                                             |                                  |     |                       |
|---------|----------------------------|----|---------------------------------------------------|-----------------------------------------------------------|---------------------------------------------|-----------------------------------------------------------------------------|----------------------------------|-----|-----------------------|
| ISAb43  | Not annotated              | IR | -                                                 | -                                                         | CLM70_12480<br>CLM70_12595                  | Diguanylate cyclase-phosphodiesterase /EamA family transporter (threonine)  | Biofilm regulation               | 6   | M3Q_1620/<br>M3Q_1621 |
| ISAb42  | Not annotated              | In | CLM70_13785(N)                                    | Hypothetical                                              | -                                           | -                                                                           | -                                | N/R |                       |
| ISAb125 | Not annotated              | IR | -                                                 | -                                                         | CLM70_14685<br>(pseudogene)<br>CLM70_14690  | SAM-dependent methyl transferase/Hypothetical                               | -                                | N/R |                       |
| ISAb125 | Not annotated              | In | CLM70_15390(N)                                    | Hypothetical                                              | -                                           | -                                                                           | -                                | N/R |                       |
| IS10L   | Not annotated              | IR | -                                                 | -                                                         | CLM70_15930<br>CLM70_16745                  | Hypothetical/DNA topoisomerase I                                            | -                                | N/R |                       |
| IS10R   | CLM70_17485<br>CLM70_17490 | IR | -                                                 | -                                                         | CLM70_17480/<br>CLM70_17495                 | Predicted esterase of the alpha-beta hydrolase fold/TetC                    | -                                | N/R |                       |
| IS10L   | Not annotated              | IR | -                                                 | -                                                         | CLM70_17530<br>(pseudogene)/<br>CLM70_17535 | LysR family transcriptional regulator/MerR family transcriptional regulator | -                                | N/R |                       |
| IS10R   | Not annotated              | In | CLM70_17780(N)<br>(pseudogene)<br>CLM70_17955(C)  | Hypothetical                                              | -                                           | -                                                                           | -                                | N/R |                       |
| ISAb43  | Not annotated              | In | CLM70_18160(N)<br>(pseudogene)<br>CLM70_18175 (C) | Hypothetical protein (DUF2236)                            | -                                           | -                                                                           | -                                | N/R |                       |
| ISAb31  | CLM70_18695                | In | CLM70_18700 (N)<br>CLM70_18690 (C)                | Lipoteichoic acid synthase (LTA) like domain protein CgmA | -                                           | -                                                                           | K locus for capsule biosynthesis | N/R |                       |
| ISAb26  | CLM70_18705                | IR | -                                                 | -                                                         | CLM70_18700/<br>CLM70_18710                 | CgmA/Gne                                                                    | K locus for capsule biosynthesis | N/R |                       |



198

199 <sup>a</sup> Only most relevant IS elements were considered in this Table.

200 <sup>b</sup> N and C refer to the N- and C-terminal segments of encoded proteins.

201 <sup>c</sup> According to Adams, et al. 2016

202 <sup>d</sup> *Acinetobacter baumannii* TYTH-1

203 In: interrupted gene; IR: intergenic region; N/R: not reported

204 **REFERENCES**

- 205 1. **Cameranesi MM, Morán-Barrio J, Limansky AS, Repizo GD, Viale AM.** Site-  
206 specific recombination at XerC/D sites mediates the formation and resolution of plasmid  
207 co-integrates carrying a blaOXA-58- and TnaphA6-resistance module in *Acinetobacter*  
208 *baumannii*. *Front Microbiol.* Epub ahead of print 2018. DOI:  
209 10.3389/fmicb.2018.00066.
- 210 2. **Hu D, Liu B, Dijkshoorn L, Wang L, Reeves PR.** Diversity in the Major  
211 Polysaccharide Antigen of *Acinetobacter Baumannii* Assessed by DNA Sequencing, and  
212 Development of a Molecular Serotyping Scheme. *PLoS One* 2013;8:1–13.
- 213
